# Supplementary material for: Bayesian dynamic modeling of time series of dengue disease case counts
Source: PubMed Central journal article supplement (PMC5510904; doi:10.1371/journal.pntd.0005696), 2017-07-03
Supplement: pntd.0005696.s002.pdf [file pntd.0005696.s002.pdf]

# S1 Appendix

## Bayesian Dynamic Modeling of Time Series of Dengue Disease Case Counts

### Diagnostic measures for the model parameters convergence

We employed the Gelman-Rubin (GR) diagnostic <sup>1</sup> to evaluate MCMC convergence by analyzing the difference between multiple Markov chains. Values substantially above 1 indicate lack of convergence. We show in Table S1 the GR statistics for the standard deviations ( $\sigma_\alpha$ ,  $\sigma_T$ ,  $\sigma_{RF}$ ,  $\sigma_{SR}$  and  $\sigma_{RH}$ ) of models with RW1 time-varying coefficients  $\alpha_t$  for calendar trend and RW1 time-varying coefficients for the covariates. For most models, the convergence of the selected parameters are close to the value of 1, while some of the GR statistics for  $\sigma_T$  and  $\sigma_{SR}$  display values slightly above 1. We accept those values, because the standard deviations for these covariates reflect the convergence of 395 parameters each, showing that few of the time-varying coefficients present difficulties to converge, but in general we accept them. Fig S1 shows the trace plots and densities of the standard deviations ( $\sigma_\alpha$ ,  $\sigma_T$ ,  $\sigma_{RF}$ ,  $\sigma_{SR}$  and  $\sigma_{RH}$ ) from the model including all the covariates  $b_{t,T} + b_{t,RF} + b_{t,SR} + b_{t,RH}$ . We observed more volatility in the trace-plots for  $\sigma_T$  and  $\sigma_{SR}$  than for  $\sigma_\alpha$ ,  $\sigma_{RF}$ , and  $\sigma_{RH}$ , with densities slightly skewed to the right.

Table S1: Gelman-Rubin diagnostic for the models with RW1 time-varying coefficients  $\alpha_t$  for calendar trend and RW1 time-varying coefficients for the covariates

| Model                                      | $\sigma_\alpha$ | $\sigma_T$ | $\sigma_{RF}$ | $\sigma_{SR}$ | $\sigma_{RH}$ |
|--------------------------------------------|-----------------|------------|---------------|---------------|---------------|
| $b_{t,T}$                                  | 1.00            | 1.19       | -             | -             | -             |
| $b_{t,RF}$                                 | 1.00            | -          | 1.03          | -             | -             |
| $b_{t,SR}$                                 | 1.00            | -          | -             | 1.02          | -             |
| $b_{t,RH}$                                 | 1.00            | -          | -             | -             | 1.08          |
| $b_{t,T} + b_{t,RF}$                       | 1.00            | 1.03       | 1.03          | -             | -             |
| $b_{t,T} + b_{t,SR}$                       | 1.00            | 1.08       | -             | 1.02          | -             |
| $b_{t,T} + b_{t,RH}$                       | 1.00            | 1.32       | -             | -             | 1.03          |
| $b_{t,RF} + b_{t,SR}$                      | 1.01            | -          | 1.02          | 1.14          | -             |
| $b_{t,RF} + b_{t,RH}$                      | 1.00            | -          | 1.01          | -             | 1.00          |
| $b_{t,SR} + b_{t,RH}$                      | 1.00            | -          | -             | 1.03          | 1.01          |
| $b_{t,T} + b_{t,RF} + b_{t,SR}$            | 1.00            | 1.03       | 1.01          | 1.18          | -             |
| $b_{t,T} + b_{t,RF} + b_{t,RH}$            | 1.00            | 1.04       | 1.00          | -             | 1.04          |
| $b_{t,T} + b_{t,SR} + b_{t,RH}$            | 1.01            | 1.10       | -             | 1.02          | 1.02          |
| $b_{t,RF} + b_{t,SR} + b_{t,RH}$           | 1.00            | -          | 1.00          | 1.16          | 1.02          |
| $b_{t,T} + b_{t,RF} + b_{t,SR} + b_{t,RH}$ | 1.01            | 1.04       | 1.00          | 1.29          | 1.01          |

---

<sup>1</sup>Gelman, A and Rubin, DB. Inference from iterative simulation using multiple sequences, Statistical Science 1992; 7, 457-511.

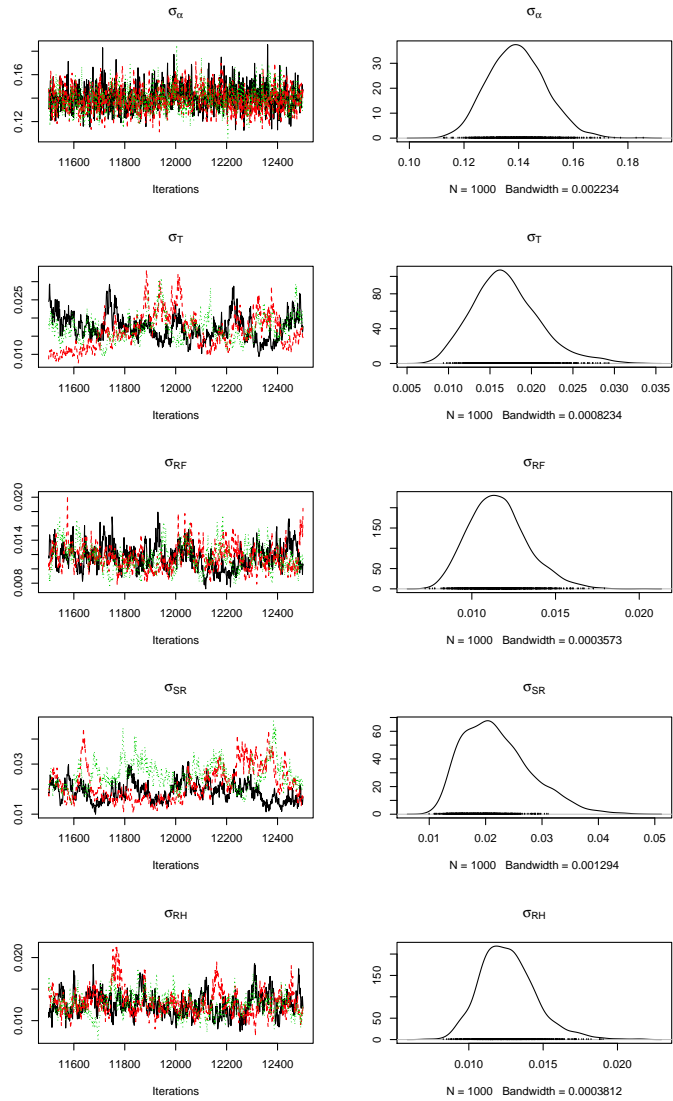

Figure S1: Trace plots and density plots for the standard deviations ( $\sigma_\alpha$ ,  $\sigma_T$ ,  $\sigma_{RF}$ ,  $\sigma_{SR}$  and  $\sigma_{RH}$ ) of the selected model for inferences
